# Supplementary material
Source: PubMed Central journal article supplement (PMC4910728)
Supplement: koni-05-05-1122860-s001.pdf [file koni-05-05-1122860-s001.pdf]

A

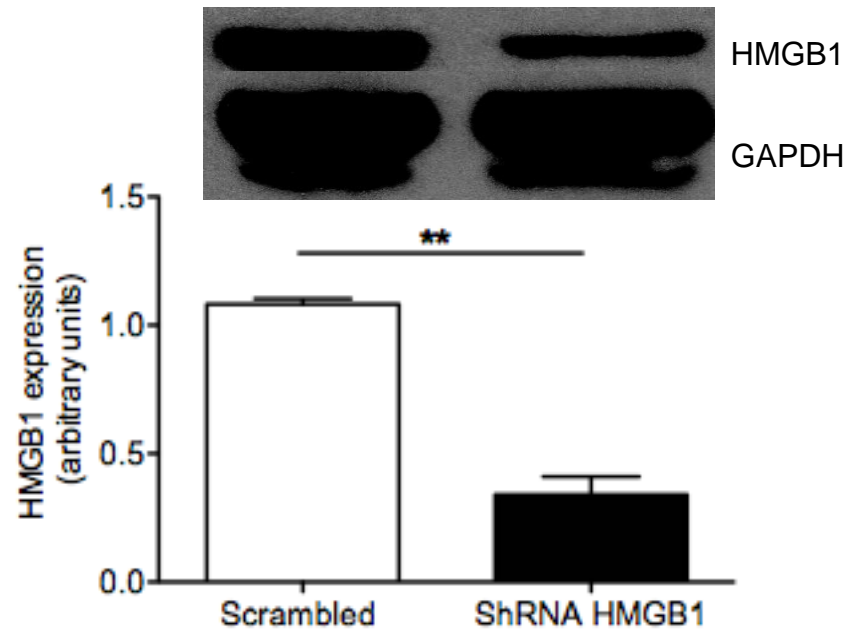

B

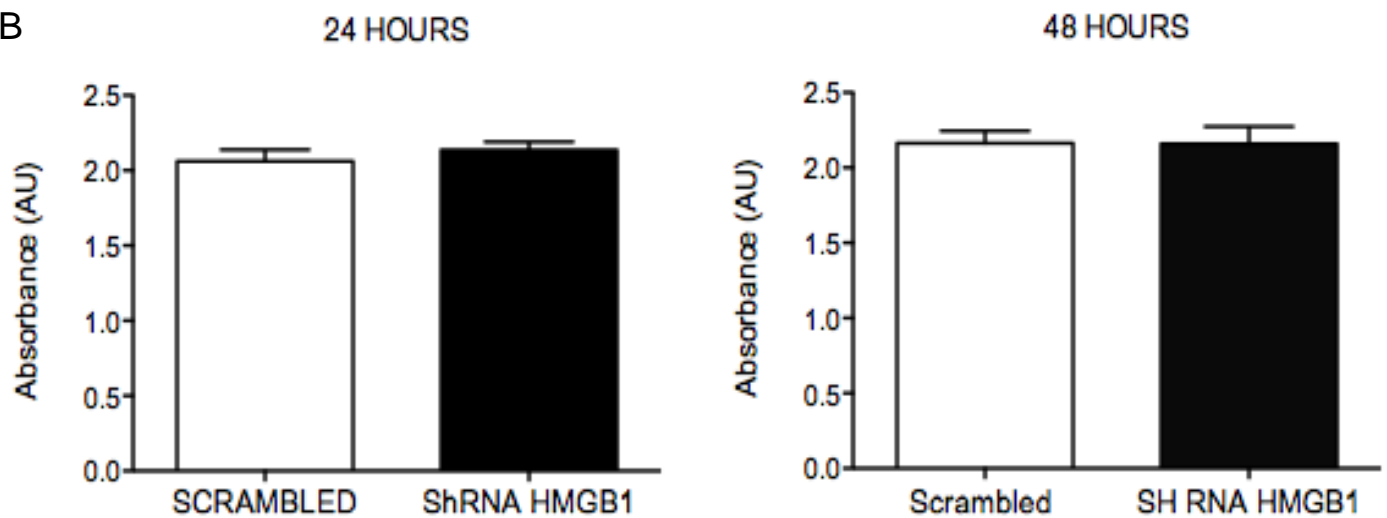

**Figure 1 supplementary. A:** The efficacy of HMGB1 silencing was verified by western blotting.

Data are expressed as mean  $\pm$  SEM, N=10 animals per group. \*\* p<0.005. Unpaired T test.

**B:** Cell proliferation of colon carcinoma cells expressing HMGB1 shRNA or LacZ a-miR LV-transduced is measured using an MTT assay at different time points (24 and 48 hours).
